# Supplementary material for: Risk for Facial Palsy after COVID-19 Vaccination, South Korea, 2021–2022
Source: PubMed Central journal article supplement (PMC11521192; doi:10.3201/eid3011.240610), 2024-11
Supplement: 24-0610-Techapp-s1.pdf [file 24-0610-Techapp-s1.pdf]

*EID cannot ensure accessibility for supplementary materials supplied by authors. Readers who have difficulty accessing supplementary content should contact the authors for assistance.*

# Risk for Facial Palsy after COVID-19 Vaccination, South Korea, 2021–2022

**Appendix Table 1.** Facial palsy case definition based on diagnostic and prescription codes\*

| Codes        | Diagnoses and prescriptions            |
|--------------|----------------------------------------|
| ICD-10 codes |                                        |
| G51.0        | Bell's palsy                           |
| G51.8        | Other disorders of facial nerve        |
| G51.9        | Disorders of facial nerve, unspecified |
| ATC code     |                                        |
| H02AB01      | Betamethasone                          |
| H02AB02      | Dexamethasone                          |
| H02AB04      | Methylprednisolone                     |
| H02AB06      | Prednisolone                           |
| H02AB08      | Triamcinolone                          |
| H02AB09      | Hydrocortisone                         |
| H02AB13      | Deflazacort                            |

\*ATC, Anatomic Therapeutic Chemical; ICD-10, International Classification of Diseases, 10th Revision.

**Appendix Table 2.** Number of facial palsy cases by COVID-19 vaccine dose and exposure window

| Vaccine doses    | Risk window, n = 5,211 | Control window, n = 10,531 | p value |
|------------------|------------------------|----------------------------|---------|
| First dose type  |                        |                            | 0.0075  |
| Pfizer-BioNTech  | 2,626                  | 5,158                      |         |
| Novavax          | 0                      | 0                          |         |
| Moderna          | 789                    | 1,636                      |         |
| Janssen          | 134                    | 373                        |         |
| AstraZeneca      | 1,662                  | 3,364                      |         |
| Second dose type |                        |                            | <0.0001 |
| Pfizer-BioNTech  | 2,692                  | 5,614                      |         |
| Novavax          | 11                     | 4                          |         |
| Moderna          | 685                    | 1,568                      |         |
| AstraZeneca      | 1,362                  | 2,793                      |         |
| Not vaccinated   | 461                    | 552                        |         |
| Third dose type  |                        |                            | <0.0001 |
| Pfizer-BioNTech  | 2,276                  | 4,309                      |         |
| Novavax          | 22                     | 16                         |         |
| Moderna          | 1,315                  | 2,605                      |         |
| Janssen          | 2                      | 5                          |         |
| Not vaccinated   | 1,596                  | 3,596                      |         |
| Fourth dose type |                        |                            | 0.6183  |
| Pfizer-BioNTech  | 4                      | 4                          |         |
| Not vaccinated   | 5,207                  | 10,527                     |         |

**Appendix Table 3.** Risk of facial palsy within 28 d of COVID-19 vaccination, stratified by age, sex, insurance type, region and underlying conditions\*

| Subgroup analyses                             | No. events |         | Person-years |          | IR   |         | IRR (95% CI)      |
|-----------------------------------------------|------------|---------|--------------|----------|------|---------|-------------------|
|                                               | Risk       | Control | Risk         | Control  | Risk | Control |                   |
| <b>Age group, y</b>                           |            |         |              |          |      |         |                   |
| 18–29                                         | 506        | 1,005   | 296.63       | 693.22   | 1.71 | 1.45    | 1.18 (1.06–1.31)† |
| 30–39                                         | 597        | 1,310   | 345.53       | 907.82   | 1.73 | 1.44    | 1.20 (1.09–1.32)† |
| 40–49                                         | 990        | 1,955   | 579.31       | 1,347.76 | 1.71 | 1.45    | 1.18 (1.09–1.27)† |
| 50–59                                         | 1,204      | 2,472   | 760.05       | 1,647.95 | 1.58 | 1.50    | 1.06 (0.99–1.13)  |
| 60–69                                         | 1,099      | 2,176   | 683.97       | 1,453.30 | 1.61 | 1.50    | 1.07 (1.00–1.15)  |
| 70–79                                         | 599        | 1,113   | 351.39       | 760.24   | 1.70 | 1.46    | 1.16 (1.05–1.29)† |
| >80                                           | 216        | 500     | 131.96       | 332.74   | 1.64 | 1.50    | 1.09 (0.93–1.28)  |
| <b>Sex</b>                                    |            |         |              |          |      |         |                   |
| M                                             | 2,849      | 5,938   | 1,766.69     | 3,981.28 | 1.61 | 1.49    | 1.08 (1.03–1.13)† |
| F                                             | 2,362      | 4,593   | 1,382.14     | 3,161.77 | 1.71 | 1.45    | 1.18 (1.12–1.24)† |
| <b>Health insurance type</b>                  |            |         |              |          |      |         |                   |
| National health insurance                     | 5,045      | 10,170  | 3,043.69     | 6,908.08 | 1.66 | 1.47    | 1.13 (1.09–1.16)† |
| Medical aid                                   | 166        | 361     | 105.15       | 234.96   | 1.58 | 1.54    | 1.03 (0.86–1.23)  |
| <b>Region of residence</b>                    |            |         |              |          |      |         |                   |
| Metropolitan                                  | 3,485      | 7,020   | 2,099.87     | 4,770.18 | 1.66 | 1.47    | 1.13 (1.08–1.17)† |
| Rural                                         | 1,726      | 3,511   | 1,048.96     | 2,372.86 | 1.65 | 1.48    | 1.11 (1.05–1.18)† |
| <b>Charlson comorbidity index</b>             |            |         |              |          |      |         |                   |
| <5                                            | 4,866      | 9,896   | 2,948.41     | 6,705.30 | 1.65 | 1.48    | 1.12 (1.08–1.16)† |
| ≥5                                            | 345        | 635     | 200.43       | 437.75   | 1.72 | 1.45    | 1.19 (1.04–1.35)† |
| <b>History of myocardial infarction</b>       |            |         |              |          |      |         |                   |
| N                                             | 5,170      | 10,416  | 3,116.56     | 7,073.48 | 1.66 | 1.47    | 1.13 (1.09–1.17)† |
| Y                                             | 41         | 115     | 32.28        | 69.57    | 1.27 | 1.65    | 0.77 (0.54–1.10)  |
| <b>History of congestive heart failure</b>    |            |         |              |          |      |         |                   |
| N                                             | 5,047      | 10,148  | 3,037.79     | 6,896.91 | 1.66 | 1.47    | 1.13 (1.09–1.17)† |
| Y                                             | 164        | 383     | 111.04       | 246.13   | 1.48 | 1.56    | 0.95 (0.79–1.14)  |
| <b>History of peripheral vascular disease</b> |            |         |              |          |      |         |                   |
| N                                             | 4,591      | 9,392   | 2,790.82     | 6,353.69 | 1.65 | 1.48    | 1.11 (1.07–1.15)† |
| Y                                             | 620        | 1,139   | 358.01       | 789.36   | 1.73 | 1.44    | 1.20 (1.09–1.32)† |
| <b>History of stroke</b>                      |            |         |              |          |      |         |                   |
| N                                             | 4,896      | 9,835   | 2,942.02     | 6,692.42 | 1.66 | 1.47    | 1.13 (1.09–1.17)† |
| Y                                             | 315        | 696     | 206.81       | 450.62   | 1.52 | 1.54    | 0.99 (0.86–1.13)  |
| <b>History of dementia</b>                    |            |         |              |          |      |         |                   |
| N                                             | 5,013      | 10,165  | 3,038.40     | 6,886.86 | 1.65 | 1.48    | 1.12 (1.08–1.16)† |
| Y                                             | 198        | 366     | 110.43       | 256.18   | 1.79 | 1.43    | 1.26 (1.06–1.49)† |
| <b>History of chronic pulmonary disease</b>   |            |         |              |          |      |         |                   |
| N                                             | 4,535      | 9,123   | 2,727.53     | 6,209.38 | 1.66 | 1.47    | 1.13 (1.09–1.17)† |
| Y                                             | 676        | 1,408   | 421.30       | 933.66   | 1.60 | 1.51    | 1.06 (0.97–1.17)  |
| <b>History of rheumatic disease</b>           |            |         |              |          |      |         |                   |
| N                                             | 5,074      | 10,230  | 3,060.15     | 6,944.08 | 1.66 | 1.47    | 1.13 (1.09–1.16)† |
| Y                                             | 137        | 301     | 88.68        | 198.96   | 1.54 | 1.51    | 1.02 (0.83–1.25)  |
| <b>History of peptic ulcer disease</b>        |            |         |              |          |      |         |                   |
| N                                             | 4,363      | 8,897   | 2,637.37     | 6,021.89 | 1.65 | 1.48    | 1.12 (1.08–1.16)† |
| Y                                             | 848        | 1,634   | 511.46       | 1,121.15 | 1.66 | 1.46    | 1.14 (1.05–1.24)† |
| <b>History of mild liver disease</b>          |            |         |              |          |      |         |                   |
| N                                             | 4,106      | 8,352   | 2,474.94     | 5,672.21 | 1.66 | 1.47    | 1.13 (1.09–1.17)† |
| Y                                             | 1,105      | 2,179   | 673.89       | 1,470.84 | 1.64 | 1.48    | 1.11 (1.03–1.19)† |
| <b>History of diabetes mellitus</b>           |            |         |              |          |      |         |                   |
| N                                             | 4,021      | 8,295   | 2,441.09     | 5,615.50 | 1.65 | 1.48    | 1.12 (1.07–1.16)† |
| Y                                             | 1,190      | 2,236   | 707.74       | 1,527.55 | 1.68 | 1.46    | 1.15 (1.07–1.23)† |
| <b>History of diabetic complications</b>      |            |         |              |          |      |         |                   |
| N                                             | 4,834      | 9,866   | 2,936.03     | 6,678.14 | 1.65 | 1.48    | 1.11 (1.08–1.15)† |
| Y                                             | 377        | 665     | 212.80       | 464.90   | 1.77 | 1.43    | 1.24 (1.09–1.41)† |
| <b>History of hemiplegia/paraplegia</b>       |            |         |              |          |      |         |                   |
| N                                             | 5,191      | 10,475  | 3,133.70     | 7,108.81 | 1.66 | 1.47    | 1.12 (1.09–1.16)† |
| Y                                             | 20         | 56      | 15.13        | 34.23    | 1.32 | 1.64    | 0.81 (0.48–1.36)  |
| <b>History of renal disease</b>               |            |         |              |          |      |         |                   |
| N                                             | 5,101      | 10,309  | 3,081.30     | 6,993.62 | 1.66 | 1.47    | 1.12 (1.09–1.16)† |
| Y                                             | 110        | 222     | 67.53        | 149.43   | 1.63 | 1.49    | 1.10 (0.87–1.38)  |
| <b>History of cancer</b>                      |            |         |              |          |      |         |                   |
| N                                             | 4,953      | 10,076  | 3,002.51     | 6,823.69 | 1.65 | 1.48    | 1.12 (1.08–1.16)† |
| Y                                             | 258        | 455     | 146.32       | 319.35   | 1.76 | 1.42    | 1.24 (1.06–1.44)† |

| Subgroup analyses                 | No. events |         | Person-years |          | IR   |         | IRR (95% CI)      |
|-----------------------------------|------------|---------|--------------|----------|------|---------|-------------------|
|                                   | Risk       | Control | Risk         | Control  | Risk | Control |                   |
| History of serious liver disease  |            |         |              |          |      |         |                   |
| N                                 | 5,196      | 10,510  | 3,141.33     | 7,127.18 | 1.65 | 1.47    | 1.12 (1.08–1.16)† |
| Y                                 | 15         | 21      | 7.50         | 15.86    | 2.00 | 1.32    | 1.51 (0.79–2.90)  |
| History of solid/metastatic tumor |            |         |              |          |      |         |                   |
| N                                 | 5,189      | 10,499  | 3,138.19     | 7,118.44 | 1.65 | 1.47    | 1.12 (1.08–1.16)† |
| Y                                 | 22         | 32      | 10.64        | 24.61    | 2.07 | 1.30    | 1.59 (0.90–2.80)  |
| History of HIV infection          |            |         |              |          |      |         |                   |
| N                                 | 5,210      | 10,525  | 3,146.79     | 7,138.98 | 1.66 | 1.47    | 1.12 (1.09–1.16)† |
| Y                                 | 1          | 6       | 2.05         | 4.07     | 0.49 | 1.47    | 0.33 (0.04–2.66)  |

\*IR, incidence rate; IRR, incidence rate ratio.

†These results remained significant after applying the Benjamini-Hochberg adjustment to account for multiple comparisons.

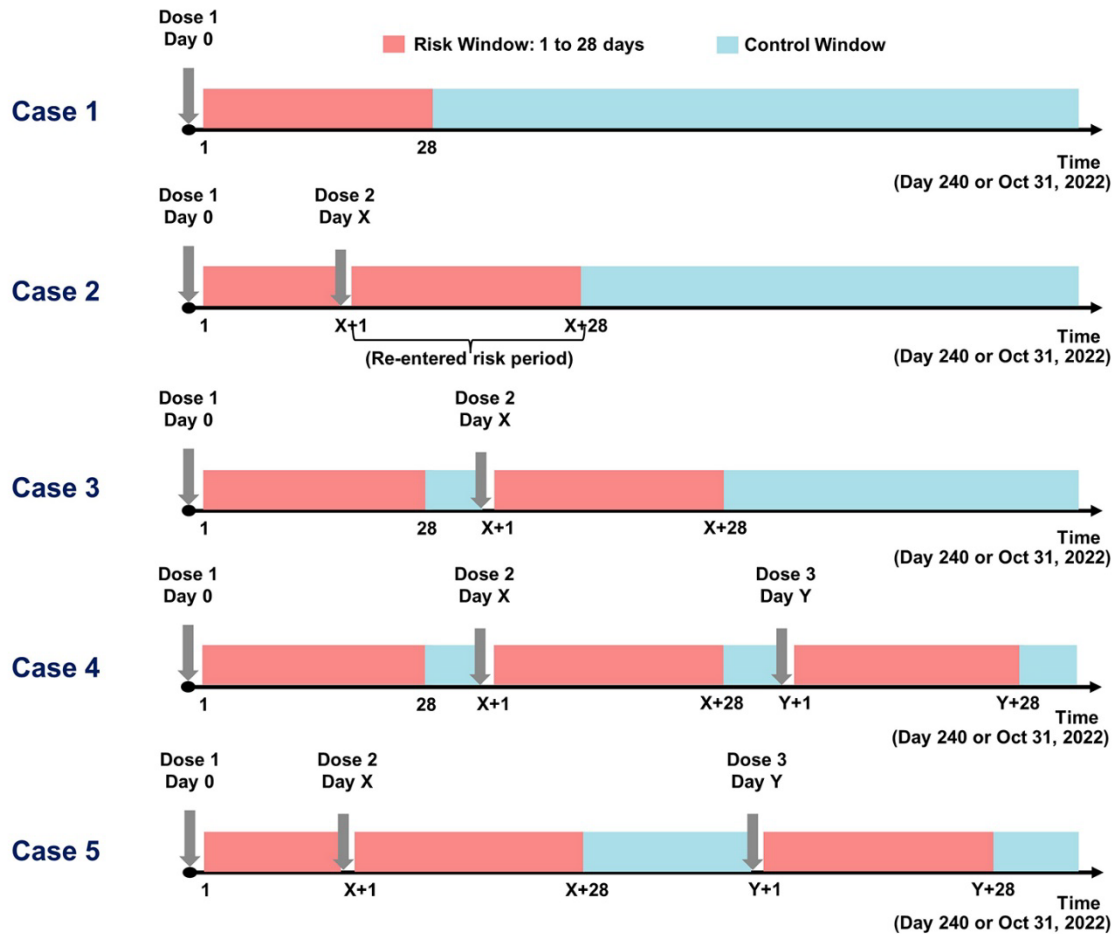

**Appendix Figure.** Self-controlled case series design assessing the risk of new-onset facial palsy following COVID-19 vaccinations is illustrated.
